# Supplementary material
Source: publisher figshare collection journal article supplement (https://tandf.figshare.com/articles/dataset/_/11854311)

Eta trajectory for SO2 2A1 state @G-I in Aug-cc-pVTZ basis

Im Energy in au

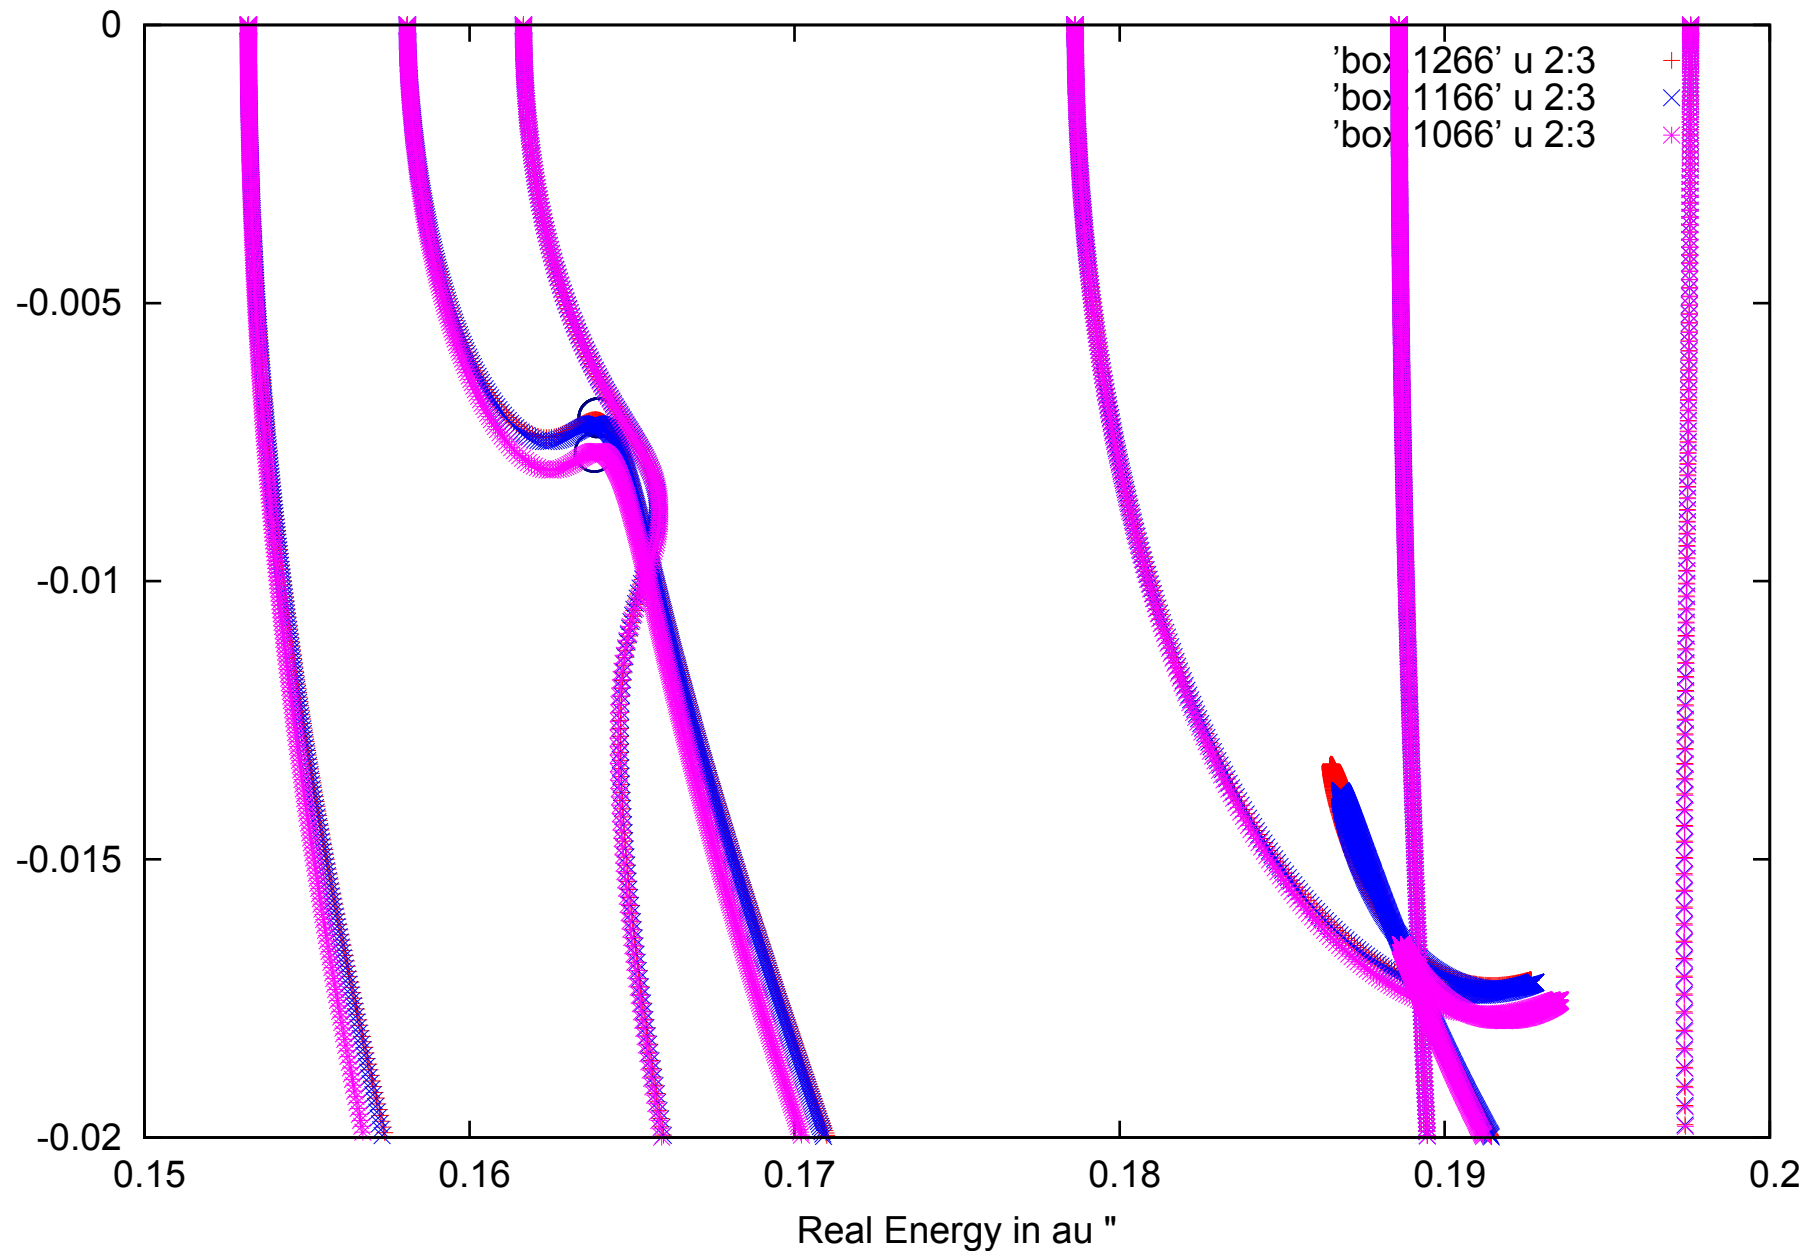

Supplement: Supplementary file 1 [file 1]

Eta trajectory for SO2 anion 2A1 state @G-II in Aug-cc-pVTZ basis

Im Energy in au

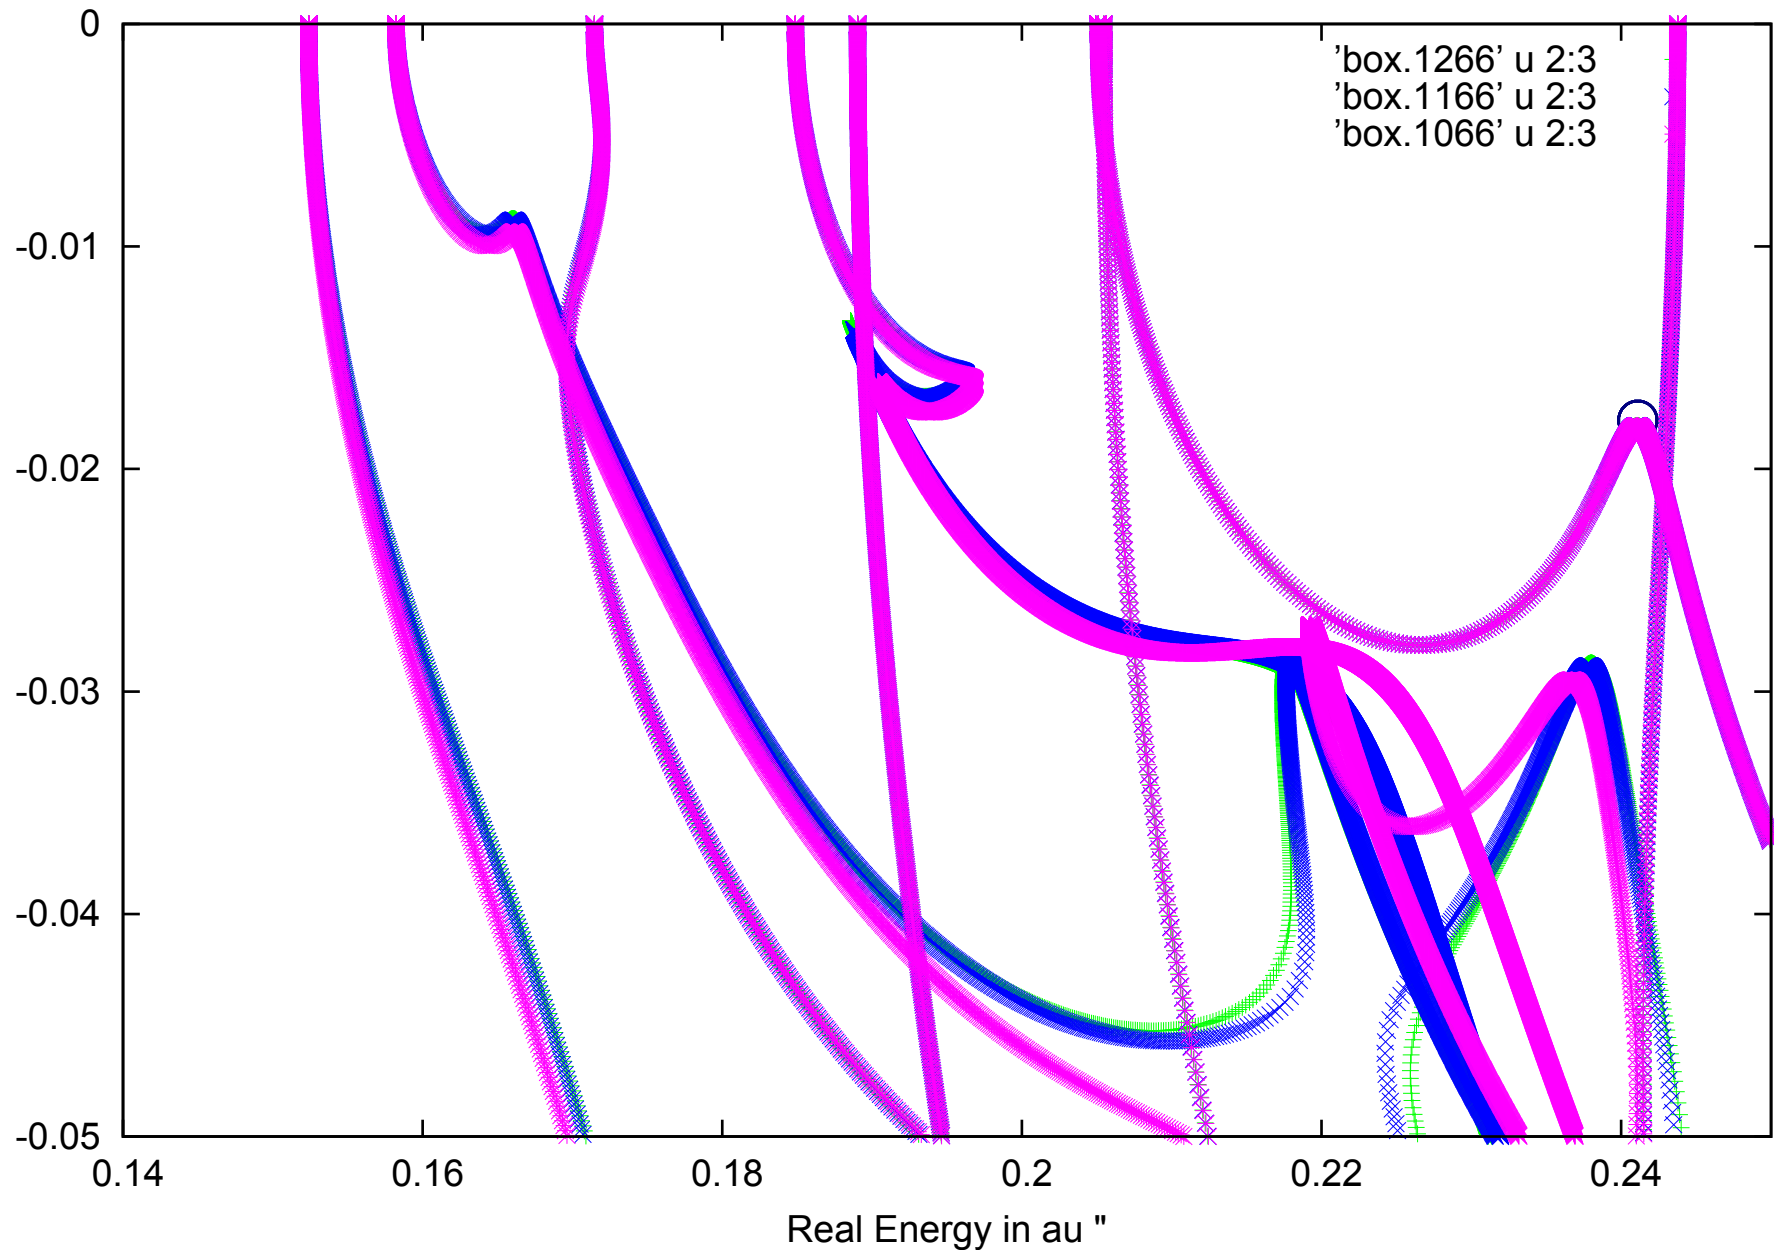

Supplement: Supplementary file 2 [file 1]
